1 **Luteolin transforms the BMDM polarity to regulate the expression of**  
2 **inflammatory factors**

3 Shuxia Wang,<sup>a</sup> Shuhang Xu,<sup>b</sup> Meng Cao,<sup>c</sup>; Jing Zhou,<sup>c</sup> Xiaodong Mao,<sup>b</sup> Xiaoming Yao,<sup>a</sup> Chao  
4 Liu,<sup>b</sup>

5 <sup>a</sup>Clinical Laboratory, Affiliated Hospital of Integrated Traditional Chinese and Western Medicine,  
6 Nanjing University of Chinese Medicine; Jiangsu Province Academy of Traditional Chinese  
7 Medicine, Nanjing, Jiangsu, China

8 <sup>b</sup> Research Center of Endocrine and Metabolic Diseases, Affiliated Hospital of Integrated  
9 Traditional Chinese and Western Medicine, Nanjing University of Chinese Medicine; Jiangsu  
10 Province Academy of Traditional Chinese Medicine, Nanjing, Jiangsu, China

11 <sup>c</sup> Affiliated Hospital of Integrated Traditional Chinese and Western Medicine, Nanjing University  
12 of Chinese Medicine, Nanjing, Jiangsu, China

13 Address correspondence to Xiaoming Yao and Chao Liu: Yaoxm73@163.com;  
14 profliuchao@163.com

15 **ABSTRACT** Macrophage are indispensable regulator cells in inflammatory response.  
16 Macrophage polarization and its secreted inflammatory factors have affinity with the outcomes of  
17 inflammation. Luteolin, a flavonoid abundant in plants has anti-inflammatory activity, but whether  
18 luteolin can manipulate M1/M2 polarization of BMDM to suppress inflammation is still veiled.  
19 The purpose of this study was to observe the effects of luteolin on the polarity of BMDM derived  
20 from C57BL/6 mice and the expression of inflammatory factors, to explore the mechanism of

21 luteolin regulating the BMDM polarity. M1-polarized BMDM were induced by LPS+IFN- $\gamma$ ,  
22 M2-polarization were stimulated with IL-4. BMDM morphology was observed by laser confocal  
23 microscopy; levels of BMDM differentiation and CD11c or CD206 on membrane surface were  
24 assessed by FCM; mRNA and protein of M1/M2-type inflammatory factors were performed by  
25 qPCR and ELISA, respectively; the expression of p-STAT1 and p-STAT6 protein pathways was  
26 detected by Western-blotting. The isolated mouse bone marrow cells were successfully  
27 differentiated into BMDM, LPS+IFN- $\gamma$  induced BMDM M1-phenotype polarization, and IL-4  
28 induced its M2-phenotype polarization. After M1-polarized BMDM treated with luteolin, M1-type  
29 pro-inflammatory factors including IL-6, TNF- $\alpha$ , iNOS, CD86 were down-regulated while  
30 M2-type anti-inflammatory factors including IL-10, Arg1, CD206 were up-regulated; the  
31 expression of M1-type surface marker CD11c decreased, nevertheless, M2-type marker CD206  
32 increased; levels of inflammatory signaling protein p-STAT1 and p-STAT6 were attenuated and  
33 enhanced respectively. Our study suggests luteolin may transform BMDM polarity through  
34 p-STAT1/6 to regulate the expression of inflammatory mediators, thereby inhibiting inflammation.  
35 Naturally occurring luteolin hold promise as an anti-inflammatory and immunomodulatory agent.

---

36 **KEYWORDS:** cytokines, inflammation, BMDM polarization, luteolin

37 Inflammation is the immune system's response to invading pathogens, but aberrant  
38 inflammation responses leads to a “cytokine storm” that makes patients sicker (1). Mounting  
39 evidences found that continuous and/or repeated inflammatory stimuli could also induce tumors  
40 (2). Therefore, the inflammatory response is a double-edged sword. If immune cells and  
41 pro-inflammatory cytokines are overproduced, cytokine cascades occur, called “cytokine storm”  
42 or termed as “inflammatory storm”, leading to sepsis, acute respiratory distress syndrome (ARDS)

43 and even multiple organ failure (MOF) (3). As well all know, pathogenic agents such as viral or  
44 bacterial infections incur the pathological process of sepsis which is characterized by an  
45 overwhelming generation of pro-inflammatory cytokines. Recently, global pandemic of  
46 coronavirus disease 2019 (COVID-19) suffering from severe acute respiratory syndrome  
47 coronavirus 2 (SARS-CoV-2) is also associated with macrophage hyperpolarization elicits  
48 “cytokine storms” and viral sepsis (4). Thus, the immunomodulatory therapy of inflammation is  
49 crucial for maintaining homeostasis (5-6).

50 Macrophages have been identified as critical effector cells in inflammatory/immune response  
51 and can be activated by pathogenic agents or inflammatory mediators to secrete various  
52 inflammatory factors. Meanwhile, heterogeneity and plasticity are hallmarks of macrophages, that  
53 is, M1-polarized (pro-inflammatory) macrophages and M2-polarized (anti-inflammatory)  
54 macrophages. Pathogens infection can polarize macrophages to M1-phenotype, produce high level  
55 of pro-inflammatory cytokines such as IL-6 and TNF- $\alpha$ , or effector molecules iNOS and surface  
56 markers CD11c or CD86, exert a pro-inflammatory effect and defense against pathogens.  
57 Conversely, IL-4 or TGF- $\beta$  induced M2-phenotype macrophages mainly express  
58 anti-inflammatory cytokine IL-10, effector molecule Arginase (Arg) 1 and surface marker CD206,  
59 contribute to hinder inflammation (7). Normally, the M1/M2 polarization of macrophages  
60 maintains a dynamic equilibrium. When virulent bacteria or viral infections or overmuch  
61 inflammatory molecules irritation, this balance is disrupted, excessive M1 polarization of  
62 macrophages will generate redundant inflammatory factors, causing systemic inflammatory  
63 response syndrome (SIRS, namely sepsis) and MOF (8). Therefore, it is particularly vital to skew  
64 the macrophage polarization and avoid excessive M1-polarization, thus reduce the inflammatory

65 response and promote tissue remodeling.

66 At present, most anti-inflammatory agents are glucocorticoids, antibiotics or antivirals.  
67 Hormones not only produce immunosuppression, but also induce secondary infections and  
68 prolong the disease course or other side effects. Antibiotics or antiviral drugs only kill the  
69 pathogen, and that antibiotics lyse the bacteria while killing the bacteria, releasing more toxins to  
70 induce "cytokine storms", further exacerbating the inflammatory response and promoting the  
71 promoting factor to the development of sepsis. In this regard, natural anti-inflammatory immune  
72 drugs extracted from plants have multi-effect regulation and less toxic, and especially have  
73 obvious benefits in suppressing inflammation. Therefore, it is urgent to seek natural compounds  
74 with high efficiency and low toxicity as anti-inflammatory immune agents.

75 Luteolin (Lut) is a flavonoid, mainly exists in fruits, vegetables and Chinese herbs, which has  
76 anti-hyperlipidemia (9), antitumor (10), anti-inflammation and immunoregulation (11). Studies  
77 showed that luteolin also has antiviral effects against Influenza A virus or dengue virus by  
78 interfering with coat protein (12-13). Recently research indicated that active ingredients of  
79 Chinese medicines including luteolin, quercetin etc. could manage COVID-19 by targeting on  
80 AEC2 and 3CL protein and dampen inflammatory mediators without side effects and have  
81 achieved significant clinical efficacies (14). Our previous investigation found that luteolin can  
82 regulate the expression of inflammatory factors in macrophages and play an anti-inflammatory  
83 role (7), but whether luteolin can regulate the polarization of macrophages and its molecular  
84 mechanism is still veiled. In this research, bone marrow cells isolated from C57BL/6 mice were  
85 induced to differentiate into bone marrow-derived macrophages (BMDM) for investigating the  
86 effects of luteolin on the M1/2 polarization of BMDM and the expression of inflammatory factors

87 so as to explore the underlying mechanism. Our present findings preliminary provided luteolin  
88 could be a future perspective for the natural anti-inflammatory agent in prevention and treatment  
89 of sepsis.

## 90 **MATERIALS AND METHODS**

91 **Mice.** 6-week-old C57BL/6 mice (weighting 18-22 g) were provided from animal  
92 experimental center of affiliated hospital of integrated traditional Chinese and Western medicine,  
93 Nanjing University of Chinese medicine (Nanjing, China). Mice were maintained under specific  
94 pathogen-free conditions and in accordance with protocols approved by the National Institute of  
95 Health Guide for Care (Ethics Number: AEW-20181019-53).

96 **Isolation and culture of BMDM.** C57BL/6 mice were sacrificed by cervical dislocation, and  
97 dissected under immersion in 75% ethanol (V/V). The epiphysis was cut after tibia and femur  
98 were separated, and the bone marrow cavity was rinsed with sterile PBS until the bone became  
99 white. The bone marrow washing solution was filtered with a 70  $\mu\text{m}$  mesh and transferred to a 50  
100 mL centrifuge tube for cell collection. After lysis of red blood cells, bone marrow stem cells were  
101 resuspended in DMEM (Gibco, USA) containing 20 ng/mL M-CSF (R&D System, USA) on  
102 10-cm petri dishes and renewed the medium every other day. After 7 days incubation, cells were  
103 labeled with F4/80-PE fluorescently conjugated antibodies (1.0  $\mu\text{L}$ ; eBioscience, USA) to identify  
104 the differentiation degree of mature BMDM by FCM (Millipore, USA).

105 **Cell viability assay.** BMDM were plated in 96-well plates at a density of  $2 \times 10^4$  cells/well in  
106 200  $\mu\text{L}$  medium with confluence overnight. After that, the cells were exposed with LPS (20 ng/mL;  
107 Sigma, USA) plus IFN- $\gamma$  (10 ng/mL; PeproTech, USA) or IL-4 (20 ng/mL; Pepro Tech, USA),

108 and LPS plus IFN- $\gamma$ -primed cells were administrated with luteolin (Sigma, USA) at 2.5 and 5.0  
109  $\mu\text{mol/L}$  for 24 h. Following treatment, cells were added with 20  $\mu\text{L}$  MTT solution (5 mg/mL;  
110 Sigma, MO. USA). 4 h later, culture medium was removed and crystals were dissolved with 150  
111  $\mu\text{L/well}$  DMSO. The absorption values were measured at 570 nm.

112 **The morphology of polarized BMDM.** BMDM in logarithmic stage were cultivated in 6-well  
113 plates, and incubated overnight followed by treatment with LPS (20 ng/mL) plus IFN- $\gamma$  (10 ng/mL)  
114 or IL-4 (20 ng/mL). Simultaneously, the cells stimulated with LPS+IFN- $\gamma$  were co-cultured with  
115 specified concentrations of luteolin for 24 h. The cell morphology was observed under an inverted  
116 microscope (Olympus, Japan). Cells and culture supernatants were collected for subsequent  
117 mRNA and protein analysis.

118 **Quantitative real-time PCR (qPCR).** BMDM were stimulated with LPS plus IFN- $\gamma$  or IL-4  
119 respectively, following dosing stimuli, cells were collected and total RNA was extracted by Trizol  
120 (Ambion Life Technology, USA) and reverse-transcribed into cDNA. With GAPDH as the  
121 internal reference, qPCR was carried out using SYBR Green Master Mix (Toyobo, Japan)  
122 according to primer sequences with Quant studio DX real-time quantitative PCR employed  
123 biosystems (Life Technologies, USA). Relative gene expression was calculated using the  $2^{-\Delta\Delta\text{ct}}$   
124 comparative method. Primer Sequences were obtained from Genaray Biotech Co. Ltd. (Shanghai,  
125 China) and listed in Table 1.

126 Table 1. Primers for quantitative real-time PCR

| Genes | Forward (5'-3') | Reverse (5'-3') |
|-------|-----------------|-----------------|
|-------|-----------------|-----------------|

---

|                                |                         |                        |
|--------------------------------|-------------------------|------------------------|
| <b>CD86</b>                    | TCAATGGGACTGCATATCTGCC  | GCCAAAATACTACCAGCTCACT |
| <b>iNOS</b>                    | CAGAGGACCCAGAGACAAGC    | TGCTGAAACATTTCTGTGC    |
| <b>IL-6</b>                    | TAGTCCTTCCTACCCCAATTTC  | TTGGTCCTTAGCCACTCCTTC  |
| <b>TNF-<math>\alpha</math></b> | CCTCCCTCTCATCAGTTCTA    | ACTTGGTGGTTTGCTACGAC   |
| <b>Arg1</b>                    | CAGAAGAATGGAAGAGTCAG    | CAGATATGCAGGGAGTC      |
| <b>CD206</b>                   | CAGGTGTGGGCTCAGGTAGT    | TGTGGTGAGCTGAAAGGTGA   |
| <b>IL-10</b>                   | CTTACTGACTGGCATGAGGATCA | GCAGCTCTAGGAGCATGTGG   |
| <b>GAPDH</b>                   | TGAAGCAGGCATCTGAGGG     | CGAAGGTGGAAGAGTGGGAG   |

---

127 **ELISA for cytokines secretion.** BMDM in exponential phase were inoculated in a six-well plate  
128 overnight. Successively, the drugs induced cell polarization and combined with different  
129 concentrations of luteolin for 24 h. The levels of cytokines in the supernatants were performed  
130 according to commercial ELISA kit (eBioscience, USA) instructions. Logistic fitting-curve for  
131 two of four parameters was used to calculate the concentration of cytokines.

132 **Flow Cytometric Staining of BMDM surface Markers.** Totally,  $5 \times 10^5$  BMDM were  
133 resuspended in 100  $\mu$ L PBS, then incubated with 0.5  $\mu$ L anti-mouse CD16/32 blocking antibody  
134 (BioLegend, San Diego, USA) to avoid nonspecific binding in an ice bath for 20 min.  
135 Subsequently, cells were stained with anti-mouse FITC-CD11c (0.5  $\mu$ L; BioLegend) or  
136 APC-CD206 (10  $\mu$ L; BioLegend) and protected from exposure to light for 30 min at room  
137 temperature. After washing with PBS, the cells were fixed with 0.5 mL paraformaldehyde at 4°C,  
138 and the mean fluorescence intensity (MFI) of membrane surface antigen CD11c or CD206 were  
139 analyzed by FCM.

140       **Protein extraction and immunoblotting.** Collect cells and extract total protein for protein  
141       quantification by BCA. After 20 µg protein was subjected to SDS-PAGE and transferred to PVDF  
142       membrane (millipore, USA), the corresponding primary antibodies against p-STAT1-tyr<sup>701</sup>,  
143       p-STAT6-tyr<sup>641</sup> (Cell Signaling Technology, USA) and β-actin (Sigma, USA) were applied at 4°C  
144       overnight. Then membranes were washed and incubated with HRP-conjugated secondary  
145       antibodies with shaken at room temperature for 30 min. Immunoreactive proteins were exposed  
146       and developed using ECL (Beyotime, China), and β-actin was used as an internal reference to  
147       calculate the relative expression of protein.

148       **Statistical analysis.** The experimental data were presented as mean ± SD. One-way ANOVA  
149       followed by Tukey's post-hoc test was used in the multiple comparisons. Analysis was performed  
150       using the GraphPad Prism 5.0 software (San Diego, CA, USA). *P* < 0.05 was considered  
151       statistically significant.

## 152       **RESULTS**

153       **Mouse bone marrow cells differentiate into macrophages.** The isolated mouse bone  
154       marrow cells were induced by M-CSF for 7 days, and FCM detected the specific marker F4/80 of  
155       mouse macrophages. The results showed that the purity of the differentiated macrophages reached  
156       92.71%, indicating that the BMDM derived from mouse bone marrow were successfully cultured  
157       and could be used in subsequent experiments (Fig. 1).



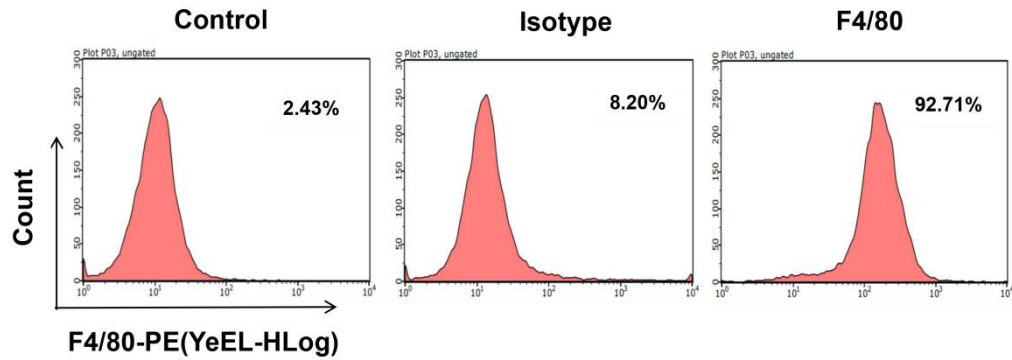

158

159 **FIG 1** The differentiation proportion of BMDM. FCM detected the surface marker F4/80 of  
160 BMDM after induction for 7 days, and the positive rate was 92.71%.

161 **Effect of luteolin on BMDM viability.** The non-cytotoxic doses of luteolin were evaluated  
162 via MTT assay to exclude contribution of anti-inflammatory potential of luteolin. Luteolin  
163 exhibited no significant impact on the LPS+IFN- $\gamma$ -primed BMDM proliferation at concentration  
164 up to 5.0  $\mu$ M at 24 h (Fig. 2 B). Therefore, non-cytotoxic concentration was chosen to assess the  
165 bioactivity of luteolin.

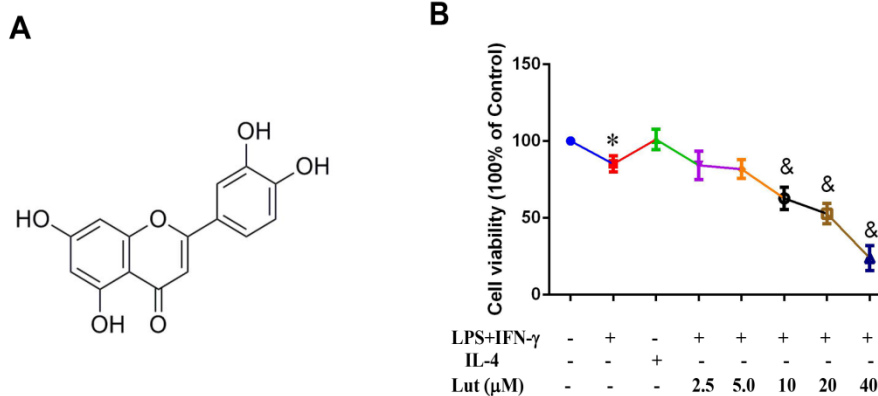

166

167 **FIG 2** Effect of luteolin on LPS+IFN- $\gamma$ -primed BMDM viability. A. Structure of luteolin. B.  
168 BMDM were primed with LPS+IFN- $\gamma$  and contributed with indicated doses of luteolin for 24 h,  
169 then the cell viability was assessed by MTT assay. Data represented mean  $\pm$  SD of three  
170 independent experiments performed in triple. Different symbols indicate a significant difference

171 according to ANOVA and Tukey test. \* $P < 0.05$  vs. control group (non-treated control); &  $P < 0.05$

172 vs. LPS+IFN- $\gamma$ -treated group.

173 **Morphology of polarized BMDM.** Microscopically, BMDM showed typical morphology of  
174 macrophages, such as round, oval or irregular shape, with pseudopods and adherential growth (Fig.  
175 3. Control group). After being induced into M1-phenotype by LPS plus IFN- $\gamma$ , the BMDM  
176 presented oval "Fried egg" appearance and pseudopodia extension (Fig. 3. LPS+IFN- $\gamma$ -treated  
177 group), while the M2-type BMDM induced by IL-4 were round and plump cytoplasm,  
178 accompanied by short pseudopodia (Fig. 3. IL-4-treated group). After various dose of luteolin  
179 contribution, M1 cells contracted slightly and pseudopodia became shorter (Fig. 3.  
180 LPS+IFN- $\gamma$ -combined with 2.5/5.0 Lut-treated groups).

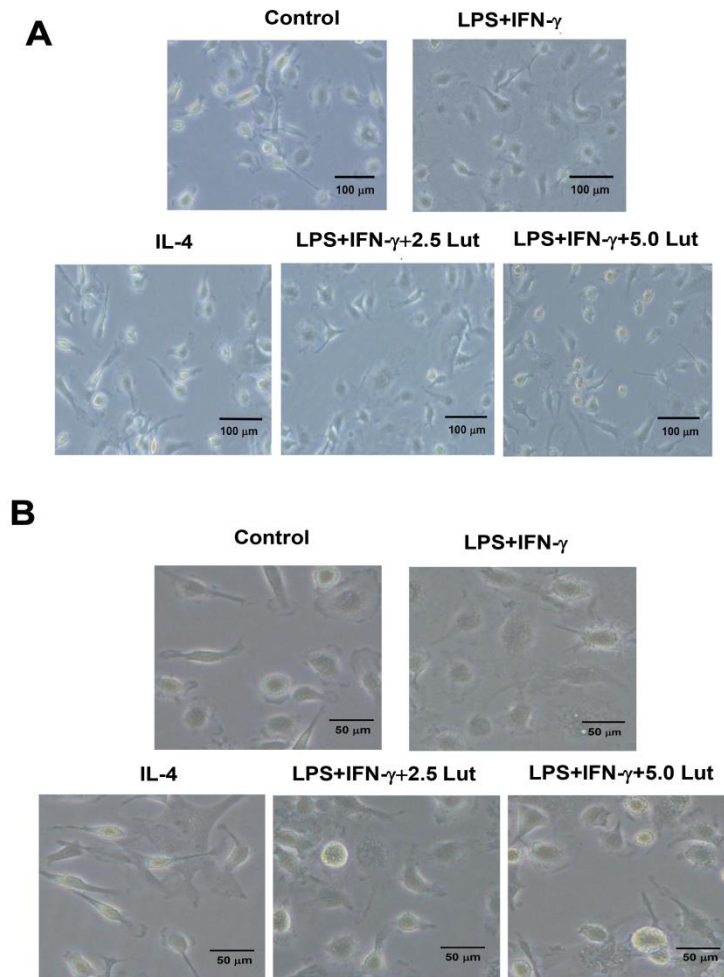

181

182 **FIG 3** The morphology of polarized BMDM (A. 100 $\times$ ; B. 200 $\times$ ). BMDM were polarized with  
183 LPS+IFN- $\gamma$  or IL-4, simultaneously, BMDM exposed to LPS+IFN- $\gamma$  were administrated with  
184 luteolin for 24 h. Micrographs of BMDM were observed using bright field Olympus imaging  
185 system.

186 **Effect of luteolin on mRNA expression of inflammatory factors in polarized BMDM.** The  
187 expression of M1-type and M2-type proinflammatory factors were detected by qPCR. Results  
188 implied that the expression of M1-type pro-inflammatory factors in M1-polarized BMDM such as  
189 CD86, iNOS, TNF- $\alpha$  and IL-6 was up-regulated; the expression of M2 type anti-inflammatory  
190 factors such as CD206, Arg1 and IL-10 in M2-polarized BMDM also up-modulated. This  
191 indicates that the polarization models of BMDM were successfully induced. When M1 cells were

192 combined with luteolin, the expression of M1-type pro-inflammatory factors were decreased (Fig.

193 4), while the expression of M2-type anti-inflammatory factors were increased (Fig. 5).

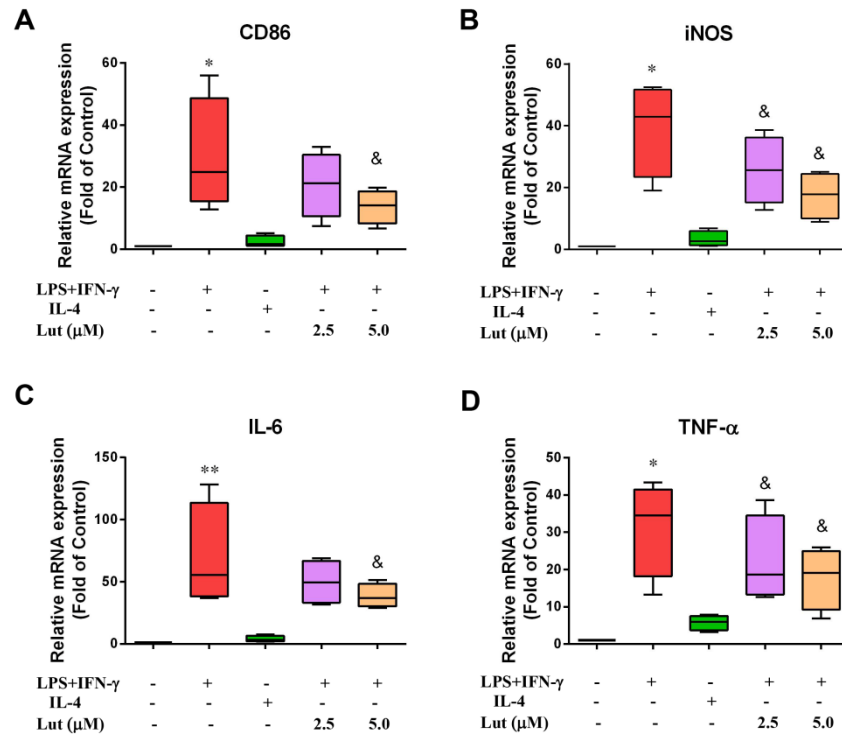

194

195 **FIG 4** Effect of luteolin on the expression of M1-type pro-inflammatory factors in activated

196 BMDM. The M1-type mRNA molecules were determined by qPCR with GAPDH as an internal

197 control. BMDM were primed with LPS+IFN-γ or IL-4, and

198 LPS+IFN-γ-treated-BMDM incubated with indicated doses of luteolin for 24 h, the relative

199 M1-type mRNA levels of CD86 (A), iNOS (B), IL-6 (C) and TNF-α (D) in M1-polarized

200 macrophages reduced slowly. Data represented mean ± SD of four independent experiments

201 performed in duplicate. Different symbols indicate a significant difference according to ANOVA

202 and Tukey test. \* $P < 0.05$ , \*\* $P < 0.01$  vs. control group (non-treated control); &  $P < 0.05$  vs.

203 LPS+IFN-γ-treated group.

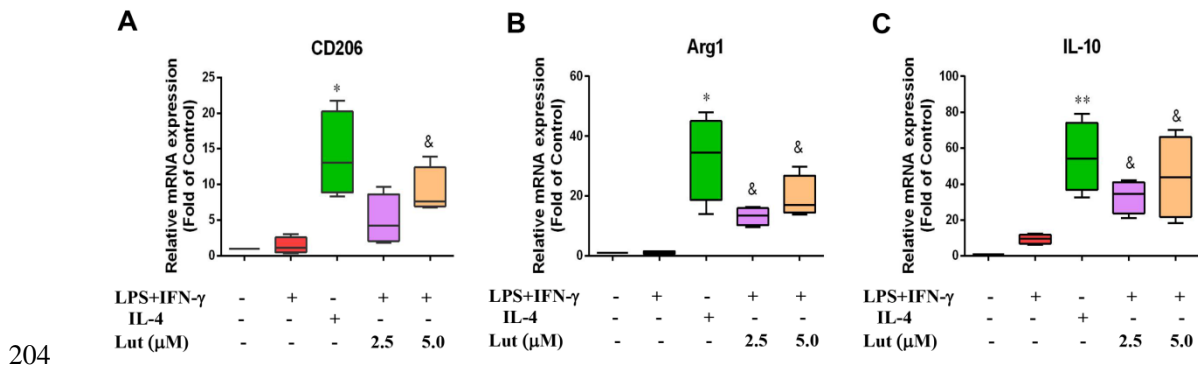

204  
 205 **FIG 5** Effect of luteolin on the expression of M2-type anti-inflammatory factors in activated  
 206 BMDM. The M2-type mRNA molecules were assessed by qPCR with GAPDH as an internal  
 207 control. BMDM were primed with LPS+IFN- $\gamma$  or IL-4, and  
 208 LPS+IFN- $\gamma$ -treated BMDM incubated with indicated doses of luteolin for 24 h, the relative  
 209 M2-type mRNA levels CD206 (A), Arg1 (B) and IL-10 (C) elevated gradually. Data represented  
 210 mean  $\pm$  SD of four independent experiments performed in duplicate. Different symbols indicate a  
 211 significant difference according to ANOVA and Tukey test. \* $P < 0.05$ , \*\* $P < 0.01$  vs. control  
 212 group (without treatment); &  $P < 0.05$  vs. LPS+IFN- $\gamma$ -treated group.

213 **Effect of luteolin on inflammatory cytokine levels in polarized BMDM.** To further explore  
 214 the polarity skewing effect of luteolin in BMDM, IL-6 and IL-10 production were measured with  
 215 ELISA. Pro-inflammatory cytokine IL-6 liberated by M1-polarized BMDM increased  
 216 significantly, in the meantime, anti-inflammatory cytokine IL-10 secreted by M2-polarized  
 217 BMDM also amplified clearly, which was statistically different from the control group (without  
 218 treatment). After various dose of luteolin challenged to M1-polarized BMDM, IL-6 released by  
 219 M1-polarized BMDM lowered visibly, while IL-10 elevated obviously, compared with  
 220 corresponding LPS+IFN- $\gamma$ -treated group, there was a statistical difference (Fig. 6).

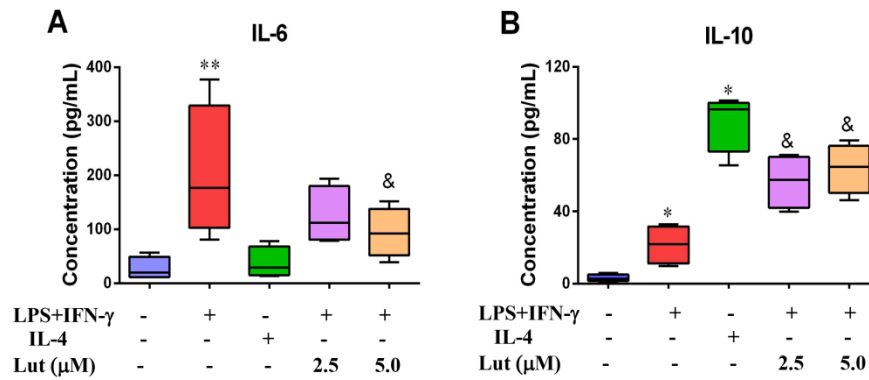

221

222 **FIG 6** Effect of luteolin on IL-6 and IL-10 levels in polarized BMDM. BMDM were primed with  
 223 LPS+IFN- $\gamma$  or IL-4, followed by luteolin exposure for 24 h. Supernatants were harvested and  
 224 levels of IL-6 (A) and IL-10 (B) secreted from the M-polarized BMDM were measured via ELISA.  
 225 Data represented mean  $\pm$  SD of four independent experiments performed in duplicate. Different  
 226 symbols indicate a significant difference according to ANOVA and Tukey test. \* $P < 0.05$  vs.  
 227 Control group (without treatment); &  $P < 0.05$  vs. LPS+IFN- $\gamma$ -treated group.

228 **Effect of luteolin on the expression of surface markers on polarized BMDM.** CD11c and  
 229 CD206 are the surface marks of M1-polarized or M2-polarized BMDM, respectively. FCM results  
 230 elevated that the MFI of CD11c (60.81) in M1-polarized BMDM was significantly enhanced  
 231 compared with that of IL-4 treatment group (13.84) and Control group (11.59). The MFI of  
 232 CD206 (58.36) in M2-polarized BMDM was also significantly amplified than that in LPS+IFN- $\gamma$   
 233 alone treatment group (12.46) and Control group (7.33). Against this, luteolin treatment  
 234 dramatically attenuated the CD11c MFI to 29.56 (LPS+IFN- $\gamma$ +2.5Lut-treated group) and 23.02  
 235 (LPS+IFN- $\gamma$ +5.0Lut-treated group) in M1-polarized BMDM, but gradually strengthened the  
 236 CD206 MFI to 16.12 (LPS+IFN- $\gamma$ +2.5 Lut-treated group) and 38.77 (LPS+IFN- $\gamma$ +5.0 Lut-treated  
 237 group) in M1-polarized BMDM in a concentration-dependent pattern (Fig.7).

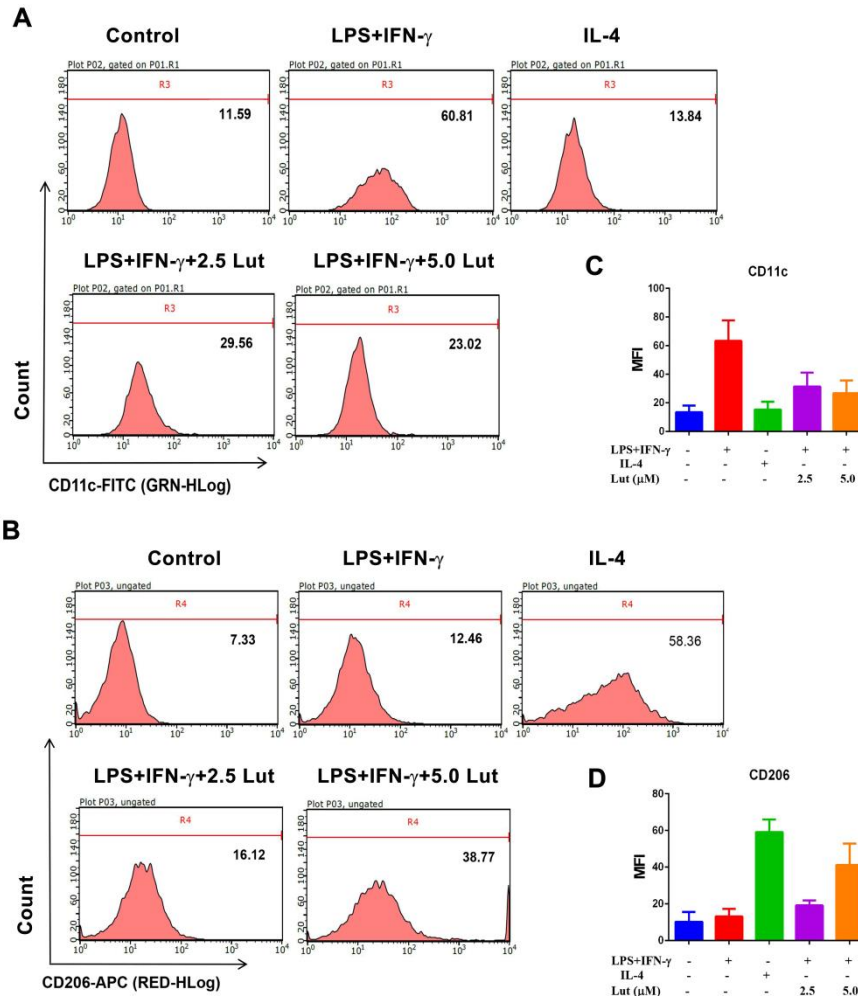

238

239 **FIG 7** Effects of luteolin on the expression of BMDM surface markers CD11c and CD206. The  
 240 BMDM were stimulated with LPS+IFN- $\gamma$  or IL-4, and then luteolin treatment for 24 h, the  
 241 expression levels of CD11c (A) and CD206 (B) protein on BMDM are presented as MFI as  
 242 evaluated by FCM. The histogram presents the MFI of CD11c (C) and CD206 (D). Data  
 243 represented mean  $\pm$  SD of three independent experiments performed in triplicate. Different  
 244 symbols indicate a significant difference according to ANOVA and Tukey test. \* $P < 0.05$  vs.  
 245 Control group (without treatment); &  $P < 0.05$  vs. LPS+IFN- $\gamma$ -treated group.

246 **Effect of luteolin on protein pathway in polarized BMDM.** STAT signaling proteins exert a  
 247 vital role in macrophage polarization and the expression of inflammatory cytokines in sepsis.  
 248 Immunoblotting assay and densitometry analysis of STAT proteins revealed that M1-polarized

249 BMDM highly expresses p-STAT1 and lowly expresses p-STAT6, whereas M2-polarized BMDM  
 250 lowly expresses p-STAT1 and highly expresses p-STAT6. Predominantly, after luteolin  
 251 contribution, p-STAT1 expression was depressed while p-STAT6 was strengthened in protein  
 252 pathway of M1-polarized BMDM (Fig. 8).

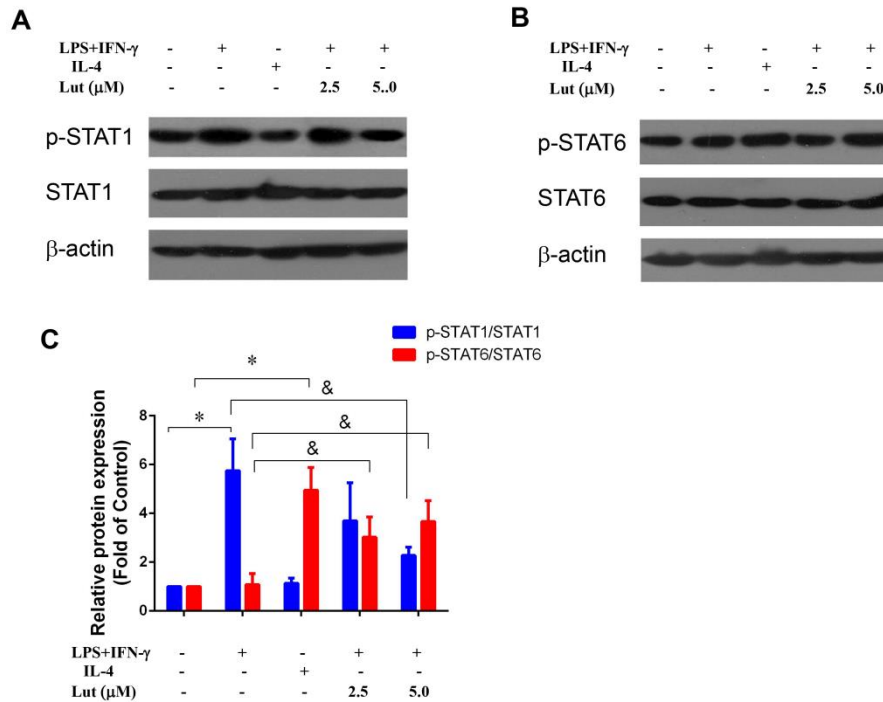

254 **FIG 8** Effects of luteolin on the protein levels of p-STAT1/6 in polarized BMDM. The BMDM  
 255 were primed with LPS+IFN- $\gamma$  or IL-4, and then for addition of luteolin for 24 h. Total cell lysates  
 256 were analyzed by immunoblotting for the indicated antibody, respectively.  $\beta$ -Actin was used as  
 257 loading control. Representative immunoblots of p-STAT1 (A) and p-STAT6 (B); The relative  
 258 protein levels of p-STAT1 and p-STAT6 (D) by densitometric analysis. Data represented mean  $\pm$   
 259 SD of three independent experiments. Different symbols indicate a significant difference  
 260 according to ANOVA and Tukey test. \* $P < 0.05$  vs. Control group (without treatment); &  $P < 0.05$   
 261 vs. LPS+IFN- $\gamma$ -treated group.



262 **DISCUSSION**

263 Infectious diseases are the leading cause of death, and the infection severity is due to an  
264 exaggerated activation of macrophages and cytokine storm (15). LPS, the main component of  
265 endotoxin, is the outer membrane structure of cell wall of Gram-negative bacteria which can bind  
266 to toll-like receptor 4 (TLR4) on macrophage surface to induce M1 polarization and secrete  
267 pleiotropic cytokines. IFN- $\gamma$  can synergy with LPS to further activate cells, secrete excessive  
268 cytokines, cause SIRS, and severe cases cause sepsis and MOF (7). Therefore, it is particularly  
269 important to regulate macrophage polarization, avoid excessive activation of M1 macrophages,  
270 reduce inflammation and promote tissue repair. BMDM are suitable cell models for studying  
271 macrophage polarization. In this investigation, bone marrow cells derived from femur of C57BL/6  
272 mice were stimulated to develop and differentiate into mature BMDM by M-CSF. LPS and IFN- $\gamma$   
273 stimulated BMDM to undergo M1 polarization, and M1-type pro-inflammatory factors including  
274 iNOS, TNF, IL-6 and surface markers CD86 and CD11C were up-regulated; IL-4 stimulated  
275 BMDM M2 polarization, and M2-type anti-inflammatory factors including Arg1, IL-10 and  
276 CD206 were up-regulated, indicating successful induction of M1/2 polarization in BMDM. After  
277 luteolin contribution, the M1-type pro-inflammatory factors decreased and the M2-type  
278 anti-inflammatory factors increased evidently in M1-polarized BMDM. Concurrently, the protein  
279 pathway p-STAT1 expression was down-regulated and p-STAT6 expression was up-regulated.  
280 It suggests that luteolin may modulate the phenotype polarization of BMDM through the  
281 inhibition of p-STAT1 and the activation of p-STTA6, transforming it from pro-inflammatory  
282 M1-type to anti-inflammatory M2-type, thereby reducing the expression of inflammatory  
283 mediators and alleviating inflammation to maintain the stability of the microenvironment.

284 Cell polarization is regulated by various signaling molecules or transcription factors. STATs  
285 are one of the pivotal signal transduction pathways and widely involved in the process of cell  
286 activation, apoptosis, inflammation and immune regulation (16). Studies by Sodhi et al. (17) and  
287 Zhou et al. (18) showed that IL-6 and IFN- $\gamma$  released by LPS-polarized M1 macrophages can  
288 promote the expression of STAT1 protein, and that IFN- $\gamma$  can also motivate STAT1 by binding to  
289 its receptor, and simultaneously, the activated STAT1 can further provoke the levels of TNF- $\alpha$ ,  
290 IL-1 $\beta$  and iNOS in macrophages. iNOS, is a signature of M1-polarized macrophages, which  
291 responsible for nitric oxide (NO) production when cells are stimulated by IFN- $\gamma$  or LPS, and  
292 excessive NO causes oxidative stress and inflammatory damage (19). Both CD86 and CD11c are  
293 surface markers of M1 macrophages. CD86 is a B7 costimulatory molecule that stimulates the  
294 activation of antigen-presenting cells to secrete more pro-inflammatory factors. In the meantime,  
295 the level of CD86 can reflect and positively correlate with the level of cytokines such as IFN- $\gamma$  and  
296 IL-12, while IL-10 can hinder the level of CD86 (20-210). CD11c is often coupled with CD18 and  
297 binds to bacterial LPS, which activates CD4<sup>+</sup>T cells to proliferate and differentiate into Th1 cells  
298 and secrete massive TNF- $\alpha$ , IL-6 and IL-12 to trigger inflammatory cascades (22). Two other  
299 crucial cytokines IL-6 and TNF- $\alpha$ , generated abundantly by IL-1 $\beta$  stimulation or autocrine from  
300 activated “mononuclear-macrophage system”, are elevated not only in bacterial infection but also  
301 during viral infection (23-24). More importantly, they are most strong pro-inflammatory agent  
302 causing “cytokine storm”. Studies have shown that patients with severe COVID-19 characterized  
303 by a “cytokine storm” inexorably exhibited high levels of IL-6 and TNF- $\alpha$  in serum, and IL-6 or  
304 TNF- $\alpha$  antagonist seems to be very promising for severe COVID-19 cases (25-26).

305 To our knowledge, IL-4 or IL-13 can induce M2-type polarization of macrophages, and

306 M2-type anti-inflammatory factors such as IL-10, Arg1 and CD206 are up-modulated. In this  
307 regard, IL-4 binds to its receptor to activate JAK to further phosphorylate STAT6 and enhance the  
308 Arg1 activity. Arg1 and iNOS are important hallmarks of M2/M1 type macrophage polarization,  
309 respectively. Under normal circumstances, the activities of Arg1 and iNOS are strictly regulated  
310 by macrophages and maintain a dynamic equilibrium. When M2 polarization occurs, Arg1  
311 competes for iNOS to decompose substrate arginine, thus benefit for tissue regeneration.  
312 Moreover, Arg1 is also inseparable from M2 macrophage properties in playing immune memory  
313 function to eliminate infectious agents. CD206, so called mannose receptor, is a membrane surface  
314 marker of M2 cells, which can specifically recognize antigens to clear pathogens, promote  
315 angiogenesis and repress immune response (27). Another M2-type anti-inflammatory factor, IL-10,  
316 on the one hand, enhances the sensitivity of macrophages to IL-4 and IL-13 by increasing the  
317 abundance of IL-4 receptors on the macrophage surface, which contributes to M2-type  
318 polarization of macrophages. On the other hand, it can synergize with IL-4 to inhibit  
319 pro-inflammatory cytokines IL-1 $\beta$  and TNF- $\alpha$  to reduce inflammation. In the light of preliminary  
320 data, IL-10 displayed higher levels in patients with sepsis and serious COVID-19 (28). All these  
321 indicate that when inflammation is motivated, an intricate network is formed between the  
322 pro-inflammatory mediators and activated STAT1, eliciting "inflammatory storm." Nevertheless,  
323 upon luteolin contribution, a complex network is also formed between anti-inflammatory  
324 mediators and activated STAT6, further facilitating the expression of anti-inflammatory factors  
325 which resist the formation of pro-inflammatory factors and alleviate inflammation accordingly.  
326 Herbal compound Physalin D can repolarize M1 toward M2 polarization in BMDM through  
327 STAT1 suppression and STAT6 activation (29), which consist with our study.

328           Altogether, BMDM polarization mechanism is complex and involves many protein  
329 pathways. Only by actively exploring the regulation of BMDM polarization and maintaining the  
330 balance of inflammatory mediators can maintain the physical stable. In this investigation,  
331 LPS/IFN- $\gamma$  induced M1 polarization and IL-4 induced M2 polarization of BMDM. After being  
332 treated with herbal compound luteolin, the M1 polarized BMDM showed lowered M1-type  
333 pro-inflammatory factors and elevated M2-type anti-inflammatory factor, and that signaling  
334 protein p-STAT1 was down-regulated and P-STAT6 was up-regulated. That is, the macrophage  
335 population underwent a transformation from a pro-inflammatory M1-phenotype to an  
336 anti-inflammator M2-phenotype. Simultaneously, inflammatory factors analogously altered from  
337 pro-inflammatory to anti-inflammatory. In light of these findings, our research provide a novel  
338 insight into the role of luteolin to be a candidate for controlling macrophage phenotype to treat  
339 infectious disease.

#### 340 **ACKNOWLEDGEMENTS**

341           We acknowledge the support of their staff and Facility of department of Endocrine and  
342 Metabolism in accomplishing this work. We also thank Dr. C. M. (Cao Meng) and Z. J. (Zhou Jing)  
343 for carrying out exploratory experiments and valuable advice. W. S. (Wang Shuxia) wrote the  
344 manuscript. Moreover, L. X. (Li Xingjia), M. X. (Mao Xiaodong), Y.W. (Yang Wanwei) and C. G.  
345 (Chen Guofang) edited this manuscript and analyzed data.

346           This work was supported by National Natural Science Foundation of China (grant number  
347 81673945; 81471010) and the Project of Jiangsu Branch of China Academy of Chinese Medical  
348 Sciences (FY201809).

349 The authors declare there are no competing interests.

## 350 REFERENCES

351 1. Chousterman BG, Swirski FK, Weber GF. 2017. Cytokine storm and sepsis disease  
352 pathogenesis. *Semin Immunopathol* 39:517-528. <https://doi.org/10.1007/s00281-017-0639-8>.

353 2. Greten FR, Grivennikov SI. 2019. Inflammation and cancer: triggers, mechanisms, and  
354 consequences. *Immunity* 51:27-41. <https://doi.org/10.1016/j.immuni.2019.06.025>.

355 3. Zhang R, Wang XB, Ni L, Di X, Ma BT, Niu S, Liu CW, Russel J. Reiter. COVID-19:  
356 Melatonin as a potential adjuvant treatment. *Life Sciences* 250 (2020): 117583.  
357 <https://doi.org/10.1016/j.lfs.2020.117583>.

358 4. Li H, Liu L, Zhang DY, Xu JY, Dai HP, Tang N, Su X, Cao B. 2020. SARS-CoV-2 and viral  
359 sepsis: observations and hypotheses. *Lancet* 395:1517-1520. [https://doi.org/10.1016/S0140-6736\(20\)30920-X](https://doi.org/10.1016/S0140-6736(20)30920-X).

361 5. Alijotas-Reig J, Esteve-Valverde E, Belizna C, Selva-O'Callaghan A, Pardos-Gea J, Quintana A,  
362 Mekinian A, Anunciacion-Llunell A, Miró-Mur F. 2020. Immunomodulatory therapy for the  
363 management of severe COVID-19. Beyond the anti-viral therapy: a comprehensive review.  
364 *Autoimmun Rev* 19:102569. <https://doi.org/10.1016/j.autrev.2020.102569>.

365 6. Liu Q, Zhou YH, Yang ZQ. 2016. The cytokine storm of severe influenza and development of  
366 immunomodulatory therapy. *Cell Mol Immunol* 13:3-10. <https://doi.org/10.1038/cmi.2015.74>.

367 7. Wang, SX, Cao M, Xu SH, Zhang JM, Wang ZG, Mao XD, Yao XM, Liu C. 2017. Effect of  
368 luteolin on inflammatory responses in RAW264.7 macrophages activated with LPS and IFN- $\gamma$ . *J*

- 369 Funct Foods 32: 123-130. <https://doi: 10.1016/j.jff.2017.02.018>.
- 370 8. Banu N, Panikar SS, Leal LR, Leal AR. 2020. Protective role of ACE2 and its downregulation  
371 in SARS-CoV-2 infection leading to macrophage activation syndrome: therapeutic implications.  
372 Life Sci 256:117905. <https://doi: 10.1016/j.lfs.2020.117905>. (Online ahead of print)
- 373 9. Wong TY, Tan YQ, Lin SM, Leung LK. 2017. Apigenin and luteolin display differential  
374 hypocholesterolemic mechanisms in mice fed a high-fat diet. Biomed Pharmacother 96:1000-1007.  
375 <https://doi: 10.1016/j.biopha.2017.11.131>.
- 376 10. Yao Y, Rao C, Zheng G, Wang S. 2019. Luteolin suppresses colorectal cancer cell metastasis  
377 via regulation of the miR-384/pleiotrophin axis. Oncol Rep 42:131-141. [https://doi:  
378 10.3892/or.2019.7136](https://doi: 10.3892/or.2019.7136).
- 379 11. Kim SH, Saba E, Kim BK, Yang WK, Park YC, Shin HJ, Han CK, Lee YC, Rhee MH. 2018.  
380 Luteolin attenuates airway inflammation by inducing the transition of CD4(+)CD25(-) to  
381 CD4(+)CD25(+) regulatory T cells. Eur J Pharmacol 820:53-64. [https://doi:  
382 10.1016/j.ejphar.2017.12.003](https://doi: 10.1016/j.ejphar.2017.12.003).
- 383 12. Yan H, Ma L, Wang H, Wu S, Huang H, Gu Z, Jiang J, Li Y. 2019. Luteolin decreases the yield  
384 of influenza A virus in vitro by interfering with the coat protein I complex expression. J Nat Med  
385 73:487-496. <https://doi: 10.1007/s11418-019-01287-7>.
- 386 13. Peng M, Watanabe S, Chan KWK, He Q, Zhao Y, Zhang Z, Lai X, Luo D, Vasudevan SG, Li  
387 G. 2017. Luteolin restricts dengue virus replication through inhibition of the proprotein convertase  
388 furin. Antiviral Res 143:176-185. <https://doi: 10.1016/j.antiviral.2017.03.026>.
- 389 14. Huang YF, Bai C, He F, Xie Y, Zhou H. 2020. Review on the potential action mechanisms of

- 390 chinese medicines in treating coronavirus disease 2019 (COVID-19). *Pharmacol Res* 158:104939.
- 391 [https://doi: 10.1016/j.phrs.2020.104939](https://doi.org/10.1016/j.phrs.2020.104939). (Online ahead of print)
- 392 15. Srikiatkachorn A , Mathew A , Rothman AL. 2017. Immune-mediated cytokine storm and its
- 393 role in severe dengue. *Semi Immunopathol* 39: 563-574. [https://doi: 10.1007/s00281-017-0625-1](https://doi.org/10.1007/s00281-017-0625-1).
- 394 16. Alhetheel A, Yakubtsov Y, Abdkader K, Sant N, Diaz-Mitoma F, Kumar A, Kryworuchko M.
- 395 2008. Amplification of the signal transducer and activator of transcription I signaling pathway and
- 396 its association with apoptosis in monocytes from HIV-infected patients. *AIDS* 22:1137-1144.
- 397 [https://doi: 10.1097/QAD.0b013e3283013d42](https://doi.org/10.1097/QAD.0b013e3283013d42).
- 398 17. Sodhi A, Keshewani V. 2007. Signaling molecules involved in production and regulation of
- 399 IL-1beta by murine peritoneal macrophages in vitro on treatment with concanavalin A. *Int*
- 400 *Immunopharmacol* 7: 1403-1413. [https:// doi: 10.1016/j.intimp.2007.07.004](https://doi.org/10.1016/j.intimp.2007.07.004).
- 401 18. Zhou DX, Huang C, Lin Z, Zhan SX, Kong LN, Fang CB, Li J. 2014. Macrophage
- 402 polarization and function with emphasis on the evolving roles of coordinated regulation of cellular
- 403 signaling pathways. *Cell Signal* 26: 192-197. [https://doi: 10.1016/j.cellsig.2013.11.004](https://doi.org/10.1016/j.cellsig.2013.11.004).
- 404 19. Rath M, Müller I, Kropf P, Closs EI, Munder M. 2014. Metabolism via arginase or nitric oxide
- 405 synthase: two competing arginine pathways in macrophages. *Front Immunol* 5:532. [https://doi:](https://doi.org/10.3389/fimmu.2014.00532)
- 406 [10.3389/fimmu.2014.00532](https://doi.org/10.3389/fimmu.2014.00532).
- 407 20. Philipp D, Suhr L, Wahlers T, Choi YH, Paunel-Görgülü A. 2018. Preconditioning of bone
- 408 marrow-derived mesenchymal stem cells highly strengthens their potential to promote
- 409 IL-6-dependent M2b polarization. *Stem Cell Res Ther* 9:286. [https://doi:](https://doi.org/10.1186/s13287-018-1039-2)
- 410 [10.1186/s13287-018-1039-2](https://doi.org/10.1186/s13287-018-1039-2).

- 411 21. Soltys J, Bonfield T, Chmiel J, Berger M. 2002. Functional IL-10 deficiency in the lung of  
412 cystic fibrosis (cftr(-/-)) and IL-10 knockout mice causes increased expression and function of B7  
413 costimulatory molecules on alveolar macrophages. *J Immunol* 168: 1903-1910. [https://doi:  
414 10.4049/jimmunol.168.4.1903](https://doi:10.4049/jimmunol.168.4.1903).
- 415 22. Sándor N, Lukácsi S, Ungai-Salánki R, Orgován N, Szabó B, Horváth R, Erdei A, Bajtay Z.  
416 2016. CD11c/CD18 dominates adhesion of human monocytes, macrophages and dendritic cells  
417 over CD11b/CD18. *Plos One* 11:e0163120. [https://doi: 10.1371/journal.pone.0163120](https://doi:10.1371/journal.pone.0163120).
- 418 23. Indalao IL, Sawabuchi T, Takahashi E, Kido H. 2017. IL-1 $\beta$  Is a key cytokine that induces  
419 trypsin upregulation in the influenza virus-cytokine-trypsin cycle, *Arch Virol* 162:201-211.  
420 [https://doi: 10.1007/s00705-016-3093-3](https://doi:10.1007/s00705-016-3093-3).
- 421 24. Gubernatorova EO, Gorshkova EA, Polinova AI, Drutskaya MS. 2020. IL-6: relevance for  
422 immunopathology of SARS-CoV-2. *Cytokine Growth F R* 53:13-24. [https://doi:  
423 10.1016/j.cytogfr.2020.05.009](https://doi:10.1016/j.cytogfr.2020.05.009).
- 424 25. Tufan A, Güler AA, Matucci-Cerinic M. 2020. COVID-19, immune system response,  
425 hyperinflammation and repurposing antirheumatic drugs. *Turk J Med Sci* 50:620-632. [https://doi:  
426 10.3906/sag-2004-168](https://doi:10.3906/sag-2004-168).
- 427 26. Feldmann M, Maini RN, Woody JN, Holgate ST, Winter G, Rowland M, Richards D, Hussell  
428 T. 2020. Trials of anti-tumour necrosis factor therapy for COVID-19 are urgently needed. *Lancet*  
429 395:1407-1409. [https://doi: 10.1016/S0140-6736\(20\)30858-8](https://doi:10.1016/S0140-6736(20)30858-8).
- 430 27. Dai K, Huang L, Sun XM, Yang LH, Gong ZJ. 2015. Hepatic CD206-positive macrophages



- 431 express amphiregulin to promote the immunosuppressive activity of regulatory T cells in HBV  
432 infection. *J Leukoc Biol* 98: 1071-1080. [https://doi: 10.1189/jlb.4A0415-152R](https://doi.org/10.1189/jlb.4A0415-152R).
- 433 28. Huang C, Wang Y, Li X, Ren L, Zhao J, Hu Y, Zhang L, Fan G, Xu J, Gu X, Cheng Z, Yu T,  
434 Xia J, Wei Y, Wu W, Xie X, Yin W, Li H, Liu M, Xiao Y, Gao H, Guo L, Xie J, Wang G, Jiang R,  
435 Gao Z, Jin Q, Wang J, Cao B. 2020. Clinical features of patients infected with 2019 novel  
436 coronavirus in Wuhan, China. *Lancet* 395:497-506. [https://doi: 10.1016/S0140-6736\(20\)30183-5](https://doi.org/10.1016/S0140-6736(20)30183-5).
- 437 29. Ding N, Wang YX, Dou C, Liu FL, GuanG, Wei KY, Yang JY, Yang MC, Tan J, Zeng W, Zhu  
438 CH. 2019. Physalin D regulates macrophage M1/M2 polarization via the STAT1/6 pathway. *J Cell*  
439 *Physiol* 234:8788-8796. [https://doi: 10.1002/jcp.27537](https://doi.org/10.1002/jcp.27537).
